# Supplementary material for: Carbon uptake during Spark Plasma Sintering: investigation through the analysis of the carbide “footprint” in a Ni–W alloy
Source: Royal Society of Chemistry journal article supplement (doi:10.1039/c5ra15439a), 2015-01-01
Supplement: c5ra15439a1.pdf [file c5ra15439a1.pdf]

## Supplementary Information

### Carbon uptake during Spark Plasma Sintering: investigation through the analysis of the carbide “footprint” in a Ni-W alloy

B. B. Bokhonov,<sup>a, b</sup> A. V. Ukhina,<sup>a</sup> D. V. Dudina,<sup>a, b, c</sup> A. G. Anisimov,<sup>c</sup>

V. I. Mali<sup>c</sup> and I. S. Batraev<sup>c</sup>

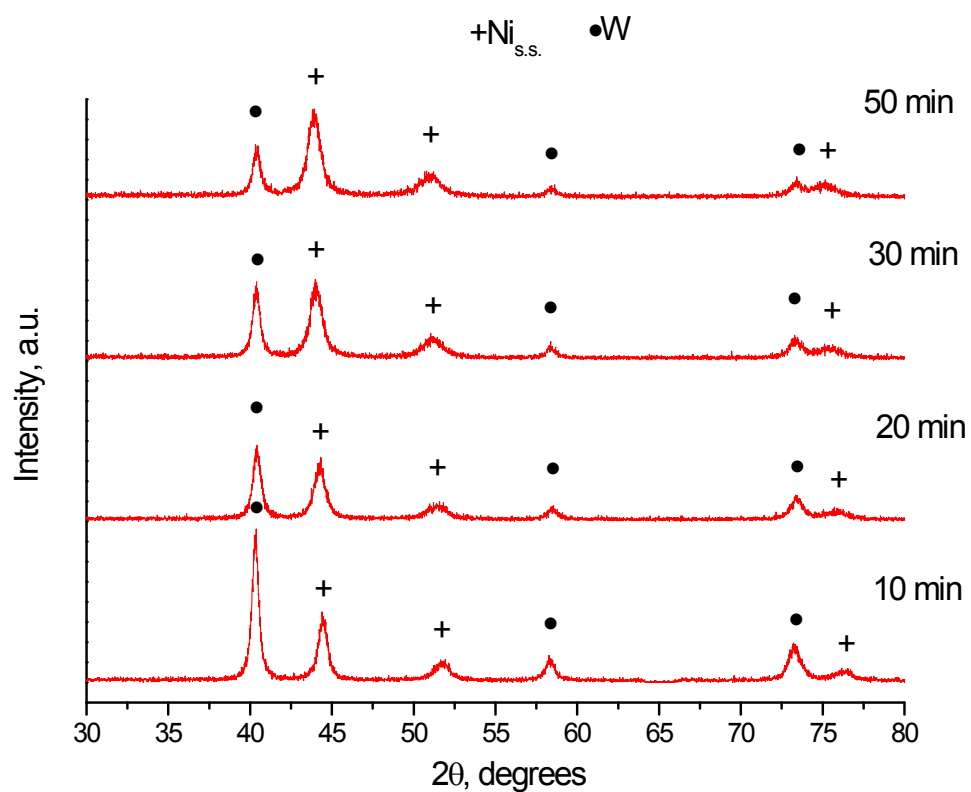

**Figure 1S.** The evolution of the XRD patterns of the mechanically milled Ni-15at.%W powder mixture with milling time ( $\text{Ni}_{\text{s.s.}}$  = Ni-based f.c.c. solid solution).

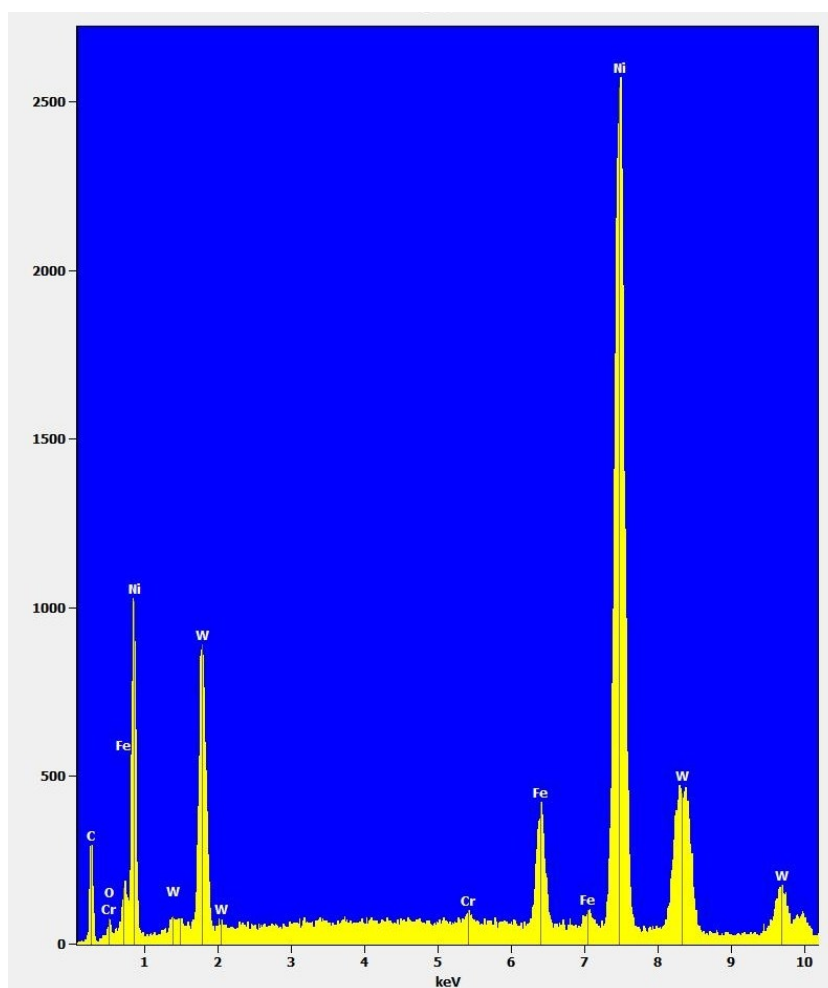

| Line | at. % | Error  |
|------|-------|--------|
| C K  | 38.08 | ± 1.00 |
| O K  | 5.92  | ± 0.61 |
| Cr K | 0.40  | ± 0.05 |
| Fe K | 4.13  | ± 0.16 |
| Ni K | 43.79 | ± 0.37 |
| W L  | 7.68  | ± 0.28 |

**Figure 2S.** EDS taken from an area in the cross-section covering the graphite foil and a WC-containing layer at one of the flat ends of the pellet. Along with W, Ni and C, Cr and Fe are present due to contamination introduced during prolonged mechanical milling.

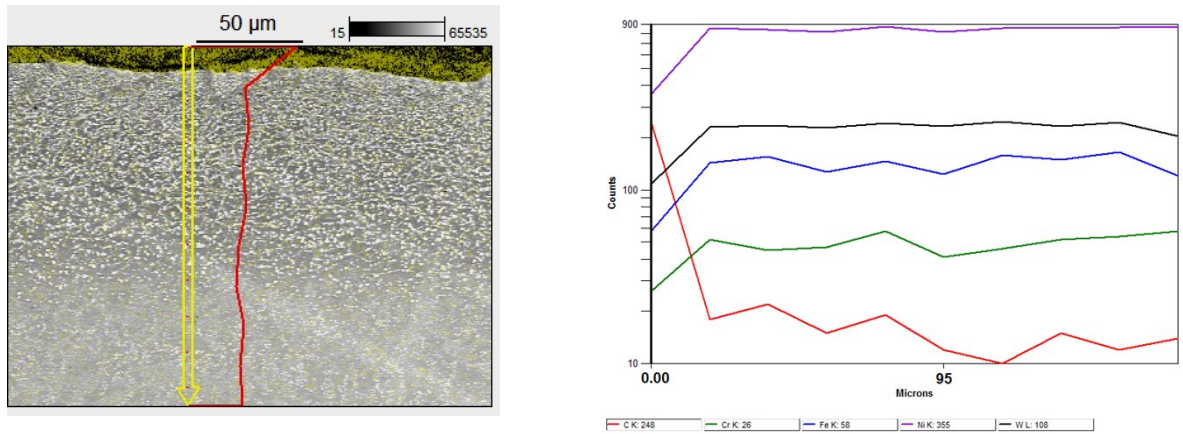

**Figure 3S.** Concentration profiles of C, Ni, W, Fe and Cr (the measurements start at the graphite foil and proceed through and beyond the WC-containing subsurface layer).

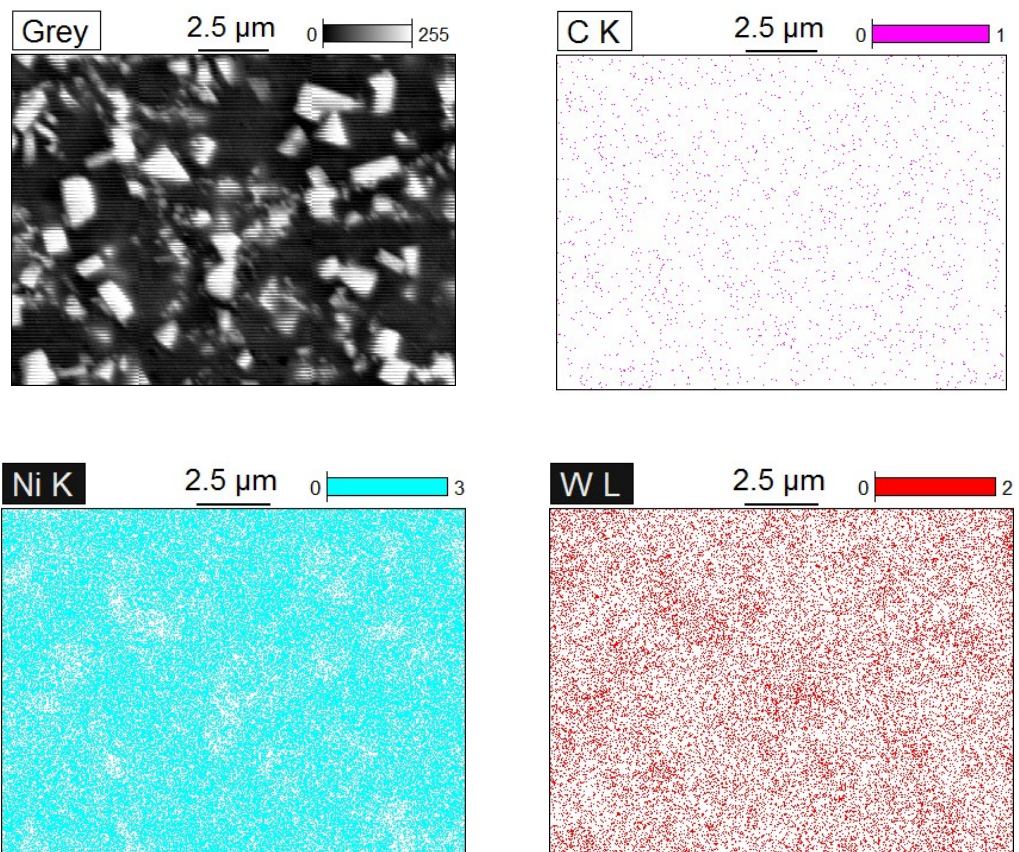

**Figure 4S.** Elemental mapping of an area of the WC-containing layer of the compact Spark Plasma Sintered from the Ni-15at.%W powder.

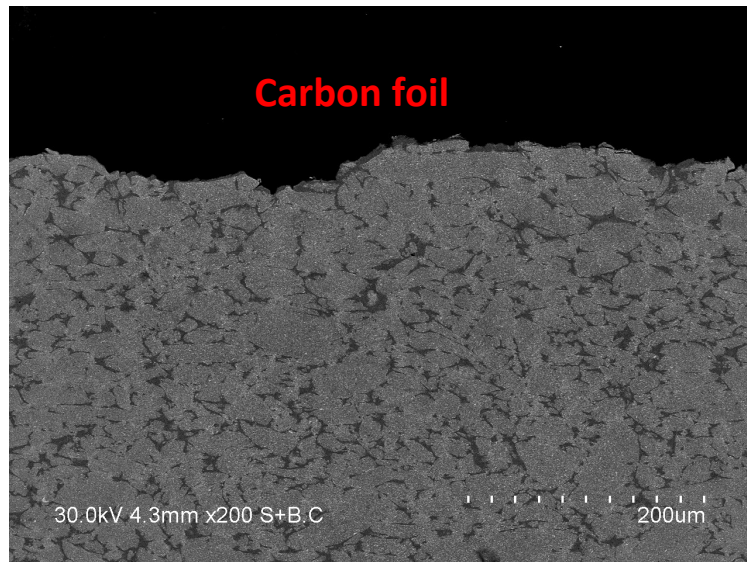

**Figure 5S.** Cross-sectional view of the pellet Spark Plasma Sintered from the Cu-15at.%W powder in contact with the graphite foil at 900 °C.

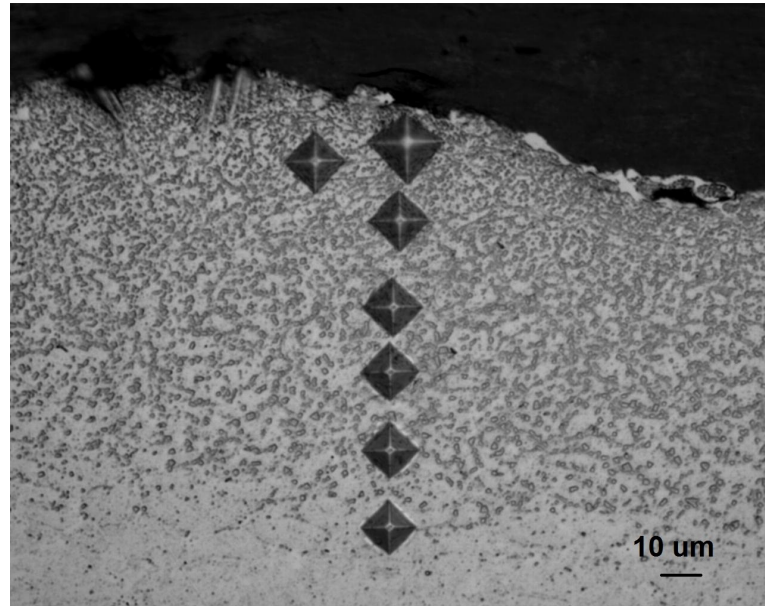

a

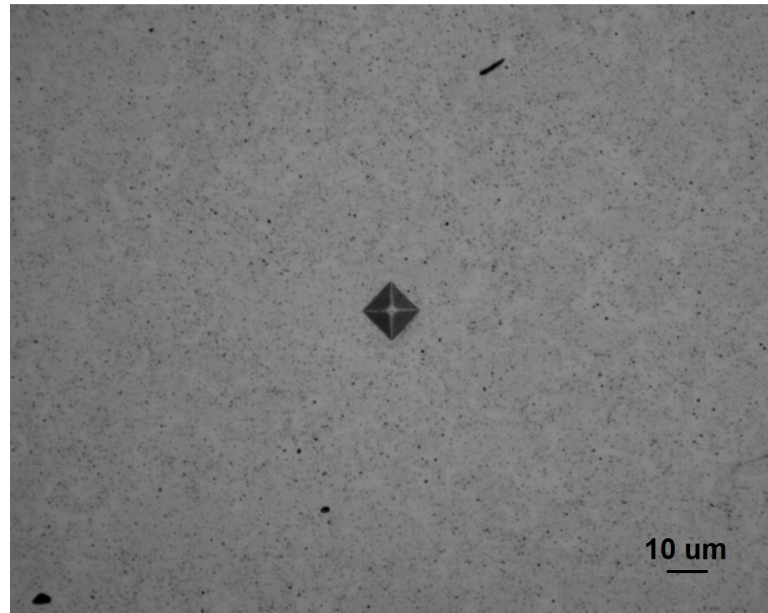

b

**Figure 6S.** Optical images of the indents obtained during Vickers hardness measurements: (a) WC-containing layer, (b) interior of the sintered pellet. The indents in (a) are deliberately placed along a vertical line perpendicular to the interface between the flat end of the sintered pellet and the graphite foil to show that their size decreases with distance from the interface.
